# Supplementary material for: Glutathione Contribution in Interactions between Turnip mosaic virus and Arabidopsis thaliana Mutants Lacking Respiratory Burst Oxidase Homologs D and F
Source: MDPI journal article supplement (doi:10.3390/ijms24087128), 2023-04-12
Supplement: s1 [file s1]

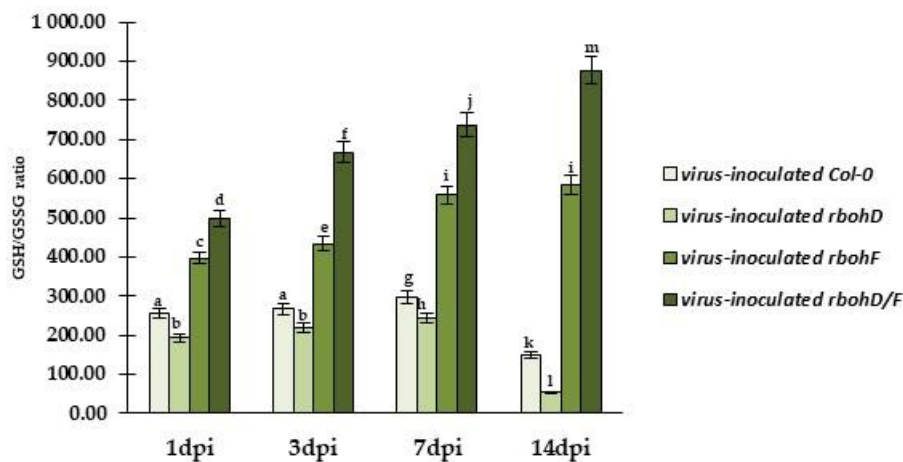

**Figure S1.** The mean GSH/GSSG ratio in TuMV- and mock-inoculated Col-0, *rbohD*, *rbohF*, and *rbohD/F* plant leaves between 1 and 14 dpi. Using ANOVA and Tukey's HSD test, the mean GSH/GSSG ratio were calculated at  $p < 0.05$ . Statistically significant values are indicated by different letters above the bars.

**Table S1.** Heatmap of PCC for cellular glutathione (localization and content), host genes expression (*AtGGT1*, *AtGSTU1*, *AtGSTU13*, *AtGSTU24*) and TuMV levels in virus-inoculated Col-0, *rbohD*, *rbohF* and *rbohD/F* plants from 7 to 14 dpi. PCC matrix values are presented pairwise for specific time dpi and marked with colors, from very dark green (PCC = 1) to bright green (PCC = -1).

| Levels for TuMV | Localization of total glutathione in cell |       | Glutathione content in cell |       |                |       | Host Gene Expression                   |       |                                         |       |                                          |       |                                          |       |                                          |       |  |  | <div><div></div><div>-1</div></div> <div><div></div><div>-0.5</div></div> <div><div></div><div>0</div></div> <div><div></div><div>0.5</div></div> <div><div></div><div>1</div></div> |
|-----------------|-------------------------------------------|-------|-----------------------------|-------|----------------|-------|----------------------------------------|-------|-----------------------------------------|-------|------------------------------------------|-------|------------------------------------------|-------|------------------------------------------|-------|--|--|--------------------------------------------------------------------------------------------------------------------------------------------------------------------------------------|
|                 |                                           |       | Levels of GSH               |       | Levels of GSSG |       | Normalized expression of <i>AtGGT1</i> |       | Normalized expression of <i>AtGSTU1</i> |       | Normalized expression of <i>AtGSTU13</i> |       | Normalized expression of <i>AtGSTU19</i> |       | Normalized expression of <i>AtGSTU24</i> |       |  |  |                                                                                                                                                                                      |
|                 | 7dpi                                      | 14dpi | 7dpi                        | 14dpi | 7dpi           | 14dpi | 7dpi                                   | 14dpi | 7dpi                                    | 14dpi | 7dpi                                     | 14dpi | 7dpi                                     | 14dpi | 7dpi                                     | 14dpi |  |  |                                                                                                                                                                                      |
| Col-0           | 7dpi                                      |       |                             |       |                |       |                                        |       |                                         |       |                                          |       |                                          |       |                                          |       |  |  |                                                                                                                                                                                      |
|                 | 14dpi                                     |       |                             |       |                |       |                                        |       |                                         |       |                                          |       |                                          |       |                                          |       |  |  |                                                                                                                                                                                      |
| <i>rbohD</i>    | 7dpi                                      |       |                             |       |                |       |                                        |       |                                         |       |                                          |       |                                          |       |                                          |       |  |  |                                                                                                                                                                                      |
|                 | 14dpi                                     |       |                             |       |                |       |                                        |       |                                         |       |                                          |       |                                          |       |                                          |       |  |  |                                                                                                                                                                                      |
| <i>rbohF</i>    | 7dpi                                      |       |                             |       |                |       |                                        |       |                                         |       |                                          |       |                                          |       |                                          |       |  |  |                                                                                                                                                                                      |
|                 | 14dpi                                     |       |                             |       |                |       |                                        |       |                                         |       |                                          |       |                                          |       |                                          |       |  |  |                                                                                                                                                                                      |
| <i>rbohD/F</i>  | 7dpi                                      |       |                             |       |                |       |                                        |       |                                         |       |                                          |       |                                          |       |                                          |       |  |  |                                                                                                                                                                                      |
|                 | 14dpi                                     |       |                             |       |                |       |                                        |       |                                         |       |                                          |       |                                          |       |                                          |       |  |  |                                                                                                                                                                                      |

**Table S2.** Heatmap of PCC for **cellular glutathione** related enzymatic activity (GGT,GR, GST and GPXL) and TuMV levels in virus-inoculated Col-0, *rbohD*, *rbohF* and *rbohD/F* plants from 7 to 14 dpi. PCC matrix values are presented pairwise for specific time dpi and marked with colors, from very dark green (PCC = 1) to bright green (PCC = -1).

| Levels for TuMV |       | Glutathione related enzymatic activity in cell |       |                          |       |                           |       |                            |       |
|-----------------|-------|------------------------------------------------|-------|--------------------------|-------|---------------------------|-------|----------------------------|-------|
|                 |       | Enzymatic Activity of GGT                      |       | Enzymatic Activity of GR |       | Enzymatic Activity of GST |       | Enzymatic Activity of GPXL |       |
|                 |       | 7dpi                                           | 14dpi | 7dpi                     | 14dpi | 7dpi                      | 14dpi | 7dpi                       | 14dpi |
| Col-0           | 7dpi  |                                                |       |                          |       |                           |       |                            |       |
|                 | 14dpi |                                                |       |                          |       |                           |       |                            |       |
| <i>rbohD</i>    | 7dpi  |                                                |       |                          |       |                           |       |                            |       |
|                 | 14dpi |                                                |       |                          |       |                           |       |                            |       |
| <i>rbohF</i>    | 7dpi  |                                                |       |                          |       |                           |       |                            |       |
|                 | 14dpi |                                                |       |                          |       |                           |       |                            |       |
| <i>rbohD/F</i>  | 7dpi  |                                                |       |                          |       |                           |       |                            |       |
|                 | 14dpi |                                                |       |                          |       |                           |       |                            |       |

**Table S3.** Heatmap of PCC for **apoplast total glutathione** localization, apoplast GSH and GSSG content, glutathione related enzymatic activity in apoplast and TuMV levels in virus-inoculated Col-0, *rbohD*, *rbohF* and *rbohD/F* plants from 7 to 14 dpi. PCC matrix values are presented pairwise for specific time dpi and marked with colors, from very dark blue (PCC = 1) to bright blue (PCC = -1).

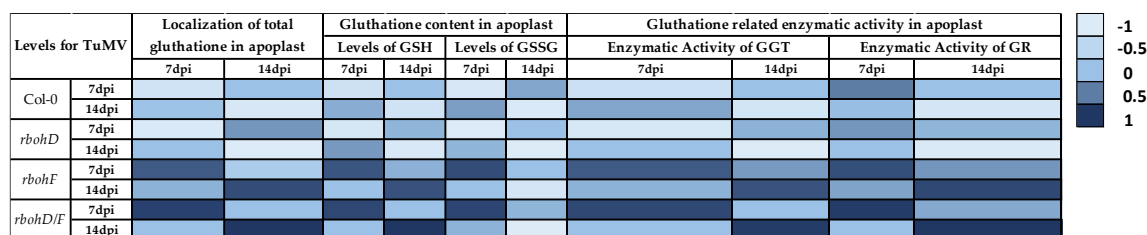

**Table S4.** Determination of the contamination of the apoplastic extracts (apoplastic washing fluid, AWF) based of total leaf G6PDH activity (in U) and % of activity G6PDH in apoplast. Non -significant cytoplasmatic contamination values are bolded.

G6PDH activity in the total leaf and in the apoplast (%) of tissue from mock and virus inoculated Arabidopsis plants (presented as means  $\pm$  se)

| Combination                     | Time               |                   |                   |                   |
|---------------------------------|--------------------|-------------------|-------------------|-------------------|
|                                 | 1dpi               | 3dpi              | 7dpi              | 14 dpi            |
| mock-inoculated Col-0           | 15.020 $\pm$ 0.04  | 17.000 $\pm$ 0.02 | 15.201 $\pm$ 0.03 | 14.500 $\pm$ 0.01 |
| % per cent activity in apoplast | <b>0.09</b>        | <b>0.11</b>       | <b>0.08</b>       | <b>0.08</b>       |
| mock-inoculated <i>rbohD</i>    | 17.2310 $\pm$ 0.03 | 18.570 $\pm$ 0.01 | 17.202 $\pm$ 0.04 | 15.290 $\pm$ 0.01 |
| % per cent activity in apoplast | <b>0.08</b>        | <b>0.075</b>      | <b>0.071</b>      | <b>0.07</b>       |
| mock-inoculated <i>rbohF</i>    | 17.600 $\pm$ 0.01  | 18.890 $\pm$ 0.03 | 17.312 $\pm$ 0.01 | 15.450 $\pm$ 0.02 |
| % per cent activity in apoplast | <b>0.1</b>         | <b>0.11</b>       | <b>0.09</b>       | <b>0.1</b>        |
| mock-inoculated <i>rbohD/F</i>  | 13.000 $\pm$ 0.04  | 16.022 $\pm$ 0.02 | 14.000 $\pm$ 0.04 | 14.133 $\pm$ 0.01 |
| % per cent activity in apoplast | <b>0.05</b>        | <b>0.05</b>       | <b>0.07</b>       | <b>0.07</b>       |
| virus-inoculated Col-0          | 22.400 $\pm$ 0.03  | 25.802 $\pm$ 0.04 | 26.011 $\pm$ 0.01 | 27.000 $\pm$ 0.03 |
| % per cent activity in apoplast | <b>0.2</b>         | <b>0.2</b>        | <b>0.23</b>       | <b>0.23</b>       |
| virus-inoculated <i>rbohD</i>   | 18.000 $\pm$ 0.04  | 18.520 $\pm$ 0.04 | 21.000 $\pm$ 0.03 | 19.202 $\pm$ 0.01 |
| % per cent activity in apoplast | <b>0.11</b>        | <b>0.11</b>       | <b>0.19</b>       | <b>0.16</b>       |
| virus-inoculated <i>rbohF</i>   | 23.200 $\pm$ 0.04  | 24.000 $\pm$ 0.01 | 24.32             | 25.020 $\pm$ 0.02 |
| % per cent activity in apoplast | <b>0.18</b>        | <b>0.2</b>        | <b>0.22</b>       | <b>0.23</b>       |
| virus-inoculated <i>rbohD/F</i> | 16.000 $\pm$ 0.01  | 16.500 $\pm$ 0.02 | 17.200 $\pm$ 0.04 | 18.200 $\pm$ 0.03 |
| % per cent activity in apoplast | <b>0.1</b>         | <b>0.11</b>       | <b>0.13</b>       | <b>0.16</b>       |

**Table S5.** Primer sequences for RT-qPCR analyses.

| Genes               | Forward Primer                                     | Reverse Primer                                 | Concentration in reaction (μM) |
|---------------------|----------------------------------------------------|------------------------------------------------|--------------------------------|
| <i>Investigated</i> |                                                    |                                                |                                |
| <i>TuMV-CP</i>      | 5'-<br>CCGGAATTCATGRTIT<br>GGTGYATIGAIAAYGG<br>-3' | 5'-<br>CGCGGATCCGCIGYYTTCATY<br>TGIRIIWKIGC-3' | 0.5                            |
| <i>AtGGT1</i>       | 5'-<br>CGGGGGCATGTGGAA<br>TCAGATC-3'               | 5'-<br>CTCTGTTTGGTATCAGCTGAT<br>GGTAG-3        | 0.5                            |
| <i>AtGSTU1</i>      | 5'-<br>GCAGTGAGGGGATGT<br>ATTC-3'                  | 5'-<br>TTTCGTAGGCAAGAAGTATC<br>T-3'            | 0.5                            |
| <i>AtGSTU13</i>     | 5'-<br>CGCAAAGCAAAAGTT<br>CAATGT-3'                | 5'-<br>TGGCACAAAACACAGACAA<br>AT-3'            | 0.5                            |
| <i>AtGSTU19</i>     | 5'-<br>ATGATGCTCAGAGGA<br>AGGTG-3'                 | 5'-<br>ATAGCCAAAGTCATCGCCAC<br>-3'             | 0,5                            |
| <i>AtGSTU24</i>     | 5'-<br>AAGGTGAGGAGCAA<br>GAAGCA-3'                 | 5'-<br>ACATACCCAAAAGTTTCGTC<br>TC-3'           | 0.5                            |
| <i>Reference</i>    |                                                    |                                                |                                |
| <i>AtEF1a</i>       | 5'-<br>CACCCTGGAGGTTT<br>TGAGG -3'                 | 3'-<br>TGGAGTATTTGGGGGTGGT -<br>5'             | 0.5                            |
| <i>AtF-Box</i>      | 5'-<br>GCTTGCACACGCCAT<br>ATCAAT-3'                | 3'-<br>TGGATTTTACCACCTTCCGCA<br>-5'            | 0.5                            |

**Table S6.** Conditions of the RT-qPCR for the reference genes (\*).

| Program                   | Parameters                                           |
|---------------------------|------------------------------------------------------|
| Preliminary denaturation  | 95 °C for 5 min                                      |
| Amplification (35 cycles) | 95 °C for 10 s<br>58 °C for 10 s<br>72 °C for 20 s * |
| Melting curve             | 65–95 °C; 0.1 °C/s                                   |

\* Fluorescence signal reading was taken at the final stage
